# Supplementary material
Source: PubMed Central journal article supplement (PMC2785175)

## Supplemental

Table. S1. Primers used for plasmid construction

(Restriction sites are underlined and mismatched bases are shown in bold type)

| Plasmid              | Primer sequence(5'-3')              |
|----------------------|-------------------------------------|
| <b>CUL4B Forward</b> | <u>CGCGGATCC</u> ATGTTTCCAACAGGTTT  |
| <b>CUL4B Reverse</b> | <u>CCGCTCGAGT</u> GCAATATAGTTGTACTG |

|                        | Plasmid            | Primer sequence(5'-3')              |
|------------------------|--------------------|-------------------------------------|
| <b>Reverse Primers</b> | <b>CUL4B 1-36</b>  | <u>CGGGATCCC</u> GGGCAGAGGTGGGCGG   |
|                        | <b>CUL4B 1-40</b>  | <u>CGGGATCCC</u> GCTTTCTCTTCTTGGCAG |
|                        | <b>CUL4B 1-50</b>  | <u>CGGGATCCC</u> GGTTACTGCTGCTACT   |
|                        | <b>CUL4B 1-115</b> | <u>CGGGATCCC</u> GCTTCGCATCAAACCC   |
| <b>Forward primer</b>  |                    | <u>CCGCTCGAGT</u> CATGTTTCCAACAGG   |

|                        | Plasmid              | Primer sequence(5'-3')                            |
|------------------------|----------------------|---------------------------------------------------|
| <b>Forward primer</b>  | <b>CUL4B 37-895</b>  | <u>CGGGGTACCA</u> AGAAGAGAAAGTTAAAC               |
|                        | <b>CUL4B 41-895</b>  | <u>CGGGGTACCTT</u> AAACAGCAGCAGCAGT<br>GCAGCAGTAA |
|                        | <b>CUL4B 150-895</b> | <u>CGGGGTACCG</u> CTTCGGTGCATCATGCA               |
| <b>Reverse Primers</b> |                      | CAGCCTGGTAGAGTTCTTCTAAAT                          |

| Plasmid                     | Primer sequence(5'-3')            |                                     |
|-----------------------------|-----------------------------------|-------------------------------------|
| <b>CUL4B 1-729 Forward</b>  | TATGGCAAGGATGTTTTTGAGGC           |                                     |
| <b>CUL4B- 1-729 Reverse</b> | <u>AGGGGGCCCA</u> AGAGAGACCTGGAGT |                                     |
| RNAi-resistant Plasmid      | Primer sequence(5'-3')            |                                     |
| <b>Outer primers</b>        | <b>Forward</b>                    | TATGGCAAGGATGTTTTTGAGGC             |
|                             | <b>Reverse</b>                    | <u>CCGCTCGAGT</u> GCAATATAGTTGTACTG |
| <b>Internal primers</b>     | <b>Forward</b>                    | TCAGAACGTACCCGGAAATATTG             |
|                             | <b>Reverse</b>                    | CAATATTTCCGGGTACGTTCTGA             |

| <b>Mutant plasmid</b>   |                          | <b>Primer sequence(5'-3')</b>                    |
|-------------------------|--------------------------|--------------------------------------------------|
| <b>Outer primers</b>    | <b>Mu Forward</b>        | <u>GGGGTACCATGTTTCCAACAGGTTT</u>                 |
|                         | <b>Mu Reverse</b>        | TCTAGACGTTTGTTAACATG                             |
| <b>Internal primers</b> | <b>Mu-1 Forward</b>      | CCGCCACCTCTGCCGCGAAGAGA                          |
|                         | <b>Mu-1 Reverse</b>      | TCTCTTCGCGGCAGAGGTGGGCGG                         |
|                         | <b>Mu-2 Forward</b>      | TCTGCCAAGAAGAGAGCGTTAAAC                         |
|                         | <b>Mu-2 Reverse</b>      | GTTTAAACGCTCTCTTCTTGGCAGA                        |
|                         | <b>Mu-3 Forward</b>      | CCCACCTCTGCCAAGGCGAGAAAG                         |
|                         | <b>Mu-3 Reverse</b>      | CTTTCTCGCCTTGGCAGAGGTGGG                         |
|                         | <b>Mu-4 Forward</b>      | TCTGCCAAGAAGGCAAAGTTAAAC                         |
|                         | <b>Mu-4 Reverse</b>      | GTTTAACTTTGCCTTCTTGGCAGA                         |
|                         | <b>Mu-5 Forward</b>      | TCTGCCAAGGCGGCAAAGTTAAAC                         |
|                         | <b>Mu-5 Reverse</b>      | GTTTAACTTTGCCGCCTTGGCAGA                         |
|                         | <b>Δ37-40 Forward</b>    | CCGCCACCTCTGCCTTAAACAGCAGCA<br>GCAGTAGCAGCAGTAAC |
|                         | <b>Mu-Δ37-40 Reverse</b> | GCTGCTGCTGTTTAAGGCAGAGGTGGGC<br>GGAGTGGTGCTGGT   |

Table. S2. Primers used for Real-time PCR

| Name                    | Primer sequence(5'-3')                |
|-------------------------|---------------------------------------|
| <b>CUL4A Forward</b>    | CATCAACAAGAGACCCAACAAGC               |
| <b>CUL4A Reverse</b>    | CCGTGGATAAACCTGAACAGGAT               |
| <b>CUL4A Probe</b>      | FAM-TCCAACGTCCGCTCCAGCTCCTCG -ECLIPSE |
| <b>CUL4B Forward</b>    | TGGAAGTTCATTTACCACCAGAGATG            |
| <b>CUL4B Reverse</b>    | TTCTGCTTTTAAACACACAGTGTCCTA           |
| <b>CUL4B Probe</b>      | FAM-TGACTGCCACTGAAGTTTCCTGCCAC-TAMRA  |
| <b>GAPDH Forward</b>    | CCAGGTGGTCTCCTCTGACTT                 |
| <b>GAPDH Reverse</b>    | GTTGCTGTAGCCAAATTCGTTGT               |
| <b>GAPDH Probe</b>      | FAM-AACAGCGACACCCACTCCTCCACC-TAMRA    |
| <b>Cyclin E Forward</b> | GAGCCAGCCTTGGGACAATAA                 |
| <b>Cyclin E Reverse</b> | GCACGTTGAGTTTGGGTAAACC                |

**FIGURE. S1.** CUL4B has a unique N-terminus. A sequence alignment of the human CUL4A with CUL4B was carried out using ClustalW alignment program. Missing amino acids are denoted by hyphens. Identical residues are highlighted in gray.

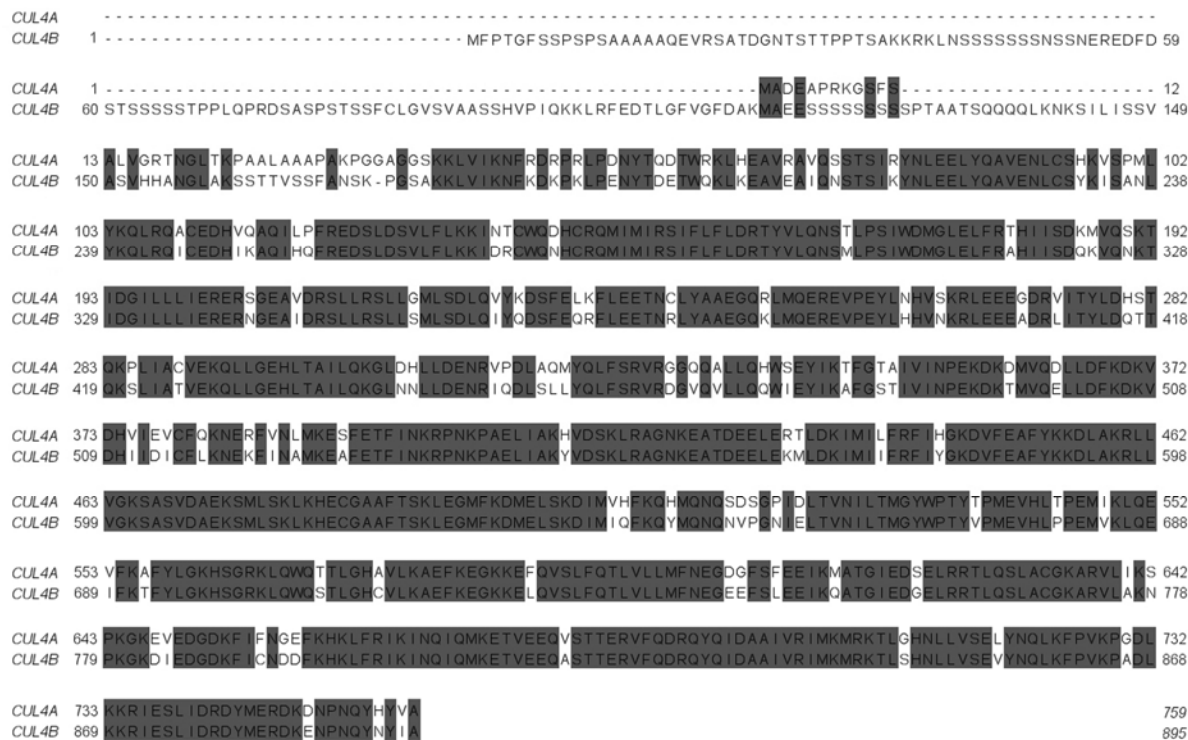

**FIGURE. S2.** Effects of CUL4B RNAi on several cell cycle regulators. Equal amounts (60µg) of total cell lysates of indicated asynchronous cells were subjected to SDS-PAGE and detected with indicated antibodies.

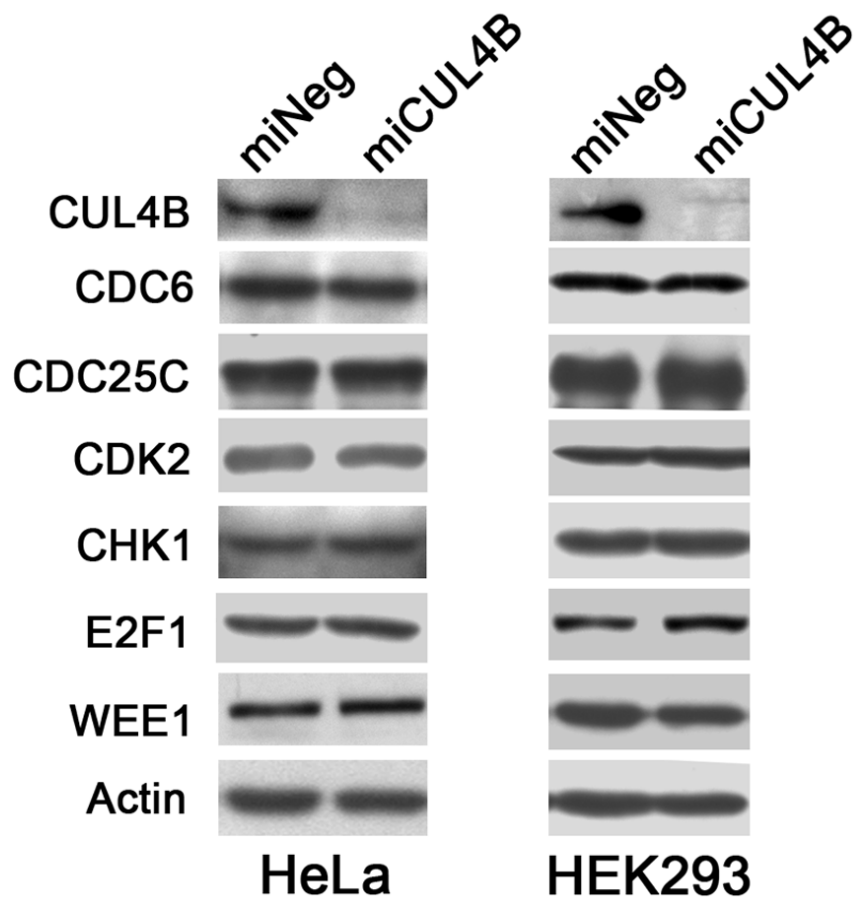

Supplement: supp_M109.050427_jbc.M109.050427-1.pdf [file supp_M109.050427_jbc.M109.050427-1.pdf]
